# Supplementary material for: Regional Assessment of Human Fecal Contamination in Southern California Coastal Drainages
Source: PubMed Central journal article supplement (PMC5580578; doi:10.3390/ijerph14080874), 2017-08-04
Supplement: ijerph-14-00874-s001.pdf [file ijerph-14-00874-s001.pdf]

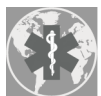

## Supplementary Materials

# Regional Assessment of Human Fecal Contamination in Southern California Coastal Drainages

Yiping Cao, Meredith R. Raith, Paul D. Smith, John F. Griffith, Stephen B. Weisberg, Alexander Schriewer, Andrew Sheldon, Chris Crompton, Geremew G. Amenu, Jason Gregory, Joe Guzman, Kelly D. Goodwin, Laila Othman, Mayela Manasjan, Samuel Choi, Shana Rapoport, Syreeta Steele, Tommy Nguyen, Xueyuan Yu

**Table S1.** Sampling summary. Sites are listed approximately from north to south as shown in the map. Column headings n.HF183, n.Ent, %>104, %>10,400 refer to the number of samples analyzed for HF183, the number of samples analyzed for *Enterococcus* spp., % of samples with greater than 104 *Enterococcus* per 100 mL and % of samples with greater than 10,400 *Enterococcus* per 100 mL. Some samples were not analyzed for enterococci due to lab errors.

| Site                     | Summer dry |       |        |           | Wet     |       |        |           |
|--------------------------|------------|-------|--------|-----------|---------|-------|--------|-----------|
|                          | n.HF183    | n.Ent | % >104 | % >10,400 | n.HF183 | n.Ent | % >104 | % >10,400 |
| Upper Ventura River      | -          | -     | -      | -         | 10      | -     | -      | -         |
| Ventura River            | 46         | -     | -      | -         | -       | -     | -      | -         |
| Upper Santa Clara River  | -          | -     | -      | -         | 7       | -     | -      | -         |
| Santa Clara River        | 49         | -     | -      | -         | -       | -     | -      | -         |
| Industrial Drain         | 47         | -     | -      | -         | -       | -     | -      | -         |
| Upper Calleguas Creek    | -          | -     | -      | -         | 8       | -     | -      | -         |
| Calleguas Creek          | 49         | -     | -      | -         | -       | -     | -      | -         |
| Ramirez Creek            | 51         | 51    | 92     | 0         | 34      | 34    | 94     | 0         |
| Escondido Creek          | 48         | 48    | 98     | 29        | 36      | 36    | 97     | 25        |
| Solstice Creek           | 30         | 30    | 40     | 0         | 27      | 27    | 70     | 0         |
| Marie Canyon Storm Drain | 48         | 48    | 100    | 2         | 36      | 36    | 100    | 0         |
| Malibu Creek             | 15         | 15    | 20     | 0         | 34      | 34    | 65     | 0         |
| Topanga Creek            | 43         | 43    | 30     | 0         | 32      | 32    | 69     | 0         |
| Santa Monica Canyon      | -          | -     | -      | -         | 37      | 37    | 100    | 24        |
| Ballona Creek            | 50         | 50    | 62     | 0         | 39      | 39    | 74     | 13        |
| Malaga Cove South        | 47         | 47    | 53     | 0         | 3       | 3     | 100    | 0         |
| Malaga Cove East         | 47         | 47    | 87     | 0         | 4       | 4     | 100    | 0         |
| Talbert Channel          | 43         | 43    | 84     | 2         | 15      | 15    | 100    | 33        |
| Santa Ana River          | 44         | 44    | 64     | 0         | 14      | 14    | 93     | 64        |
| Santa Ana Delhi Channel  | 49         | 49    | 45     | 0         | 50      | 50    | 98     | 38        |
| Costa Mesa Channel       | 50         | 50    | 100    | 10        | 50      | 50    | 86     | 32        |
| Aliso Creek              | 50         | 50    | 48     | 0         | 50      | 50    | 98     | 18        |
| San Juan Creek           | -          | -     | -      | -         | 50      | 50    | 94     | 32        |
| Cottonwood Creek         | 50         | 50    | 86     | 2         | 15      | 15    | 87     | 27        |
| Tecolote Creek           | 54         | 54    | 91     | 2         | 29      | 27    | 100    | 33        |
| San Diego River          | 53         | 53    | 45     | 4         | 24      | 24    | 92     | 8         |
| Tijuana River            | 50         | 50    | 10     | 2         | 23      | 22    | 55     | 5         |
| Overall                  | 1013       | 822   | 67     | 3         | 627     | 599   | 88     | 19        |



| (B) Wet weather          | Site ranking position |                    |      |      |      |      |      |      |        |         |        |
|--------------------------|-----------------------|--------------------|------|------|------|------|------|------|--------|---------|--------|
|                          | Site <sup>2</sup>     | n.spl <sup>1</sup> | amp1 | amp2 | amp3 | lod1 | lod2 | lod3 | lodAvg | AvgPois | AvgLod |
| Marie Canyon Storm Drain | 36                    | 1.5                | 2    | 4    | 2    | 4    | 4    | 4    | 4      | 1       | 4      |
| Solstice Creek           | 27                    | 1.5                | 1    | 1.5  | 1    | 1    | 1.5  | 1.5  | 3      | 3       | 1      |
| Ramirez Creek            | 34                    | 3                  | 3    | 1.5  | 3    | 2    | 1.5  | 1.5  | 2      | 2       | 2      |
| Topanga Creek            | 32                    | 4                  | 4    | 3    | 4    | 3    | 3    | 3    | 4      | 4       | 3      |
| Malibu Creek             | 34                    | 5                  | 5    | 6    | 5    | 6    | 5    | 6    | 5      | 5       | 5      |
| Escondido Creek          | 36                    | 6                  | 6    | 5    | 6    | 5    | 7    | 5    | 6      | 6       | 7      |
| San Diego River          | 24                    | 7                  | 7    | 7    | 7    | 7    | 6    | 7    | 7      | 7       | 6      |
| Tijuana River            | 23                    | 8                  | 10   | 10   | 9    | 10   | 11   | 11   | 14     | 14      | 14     |
| Santa Ana River          | 14                    | 9                  | 11   | 9    | 10   | 11   | 8    | 8    | 8      | 8       | 8      |
| Talbert Channel          | 15                    | 10                 | 13   | 15   | 14   | 13   | 14   | 15   | 10     | 10      | 10     |
| San Juan Creek           | 50                    | 11                 | 14.5 | 14   | 13   | 14.5 | 15   | 14   | 15     | 15      | 15     |
| Tecolote Creek           | 29                    | 12                 | 9    | 12   | 12   | 12   | 13   | 12   | 12     | 12      | 13     |
| Costa Mesa Channel       | 50                    | 14                 | 12   | 11   | 11   | 8    | 10   | 9    | 9      | 9       | 9      |
| Santa Ana Delhi Channel  | 50                    | 14                 | 14.5 | 13   | 15   | 14.5 | 12   | 13   | 13     | 13      | 12     |
| Cottonwood Creek         | 15                    | 14                 | 8    | 8    | 8    | 9    | 9    | 10   | 11     | 11      | 11     |
| Santa Monica Canyon      | 37                    | 16                 | 17   | 17   | 17   | 17   | 17   | 17   | 17     | 17      | 17     |
| Aliso Creek              | 50                    | 17                 | 16   | 16   | 16   | 16   | 16   | 16   | 16     | 16      | 16     |
| Ballona Creek            | 39                    | 18                 | 18   | 18   | 18   | 18   | 18   | 18   | 18     | 18      | 18     |

<sup>1</sup> The number of samples at each site is denoted by n.spl, and sites with 10 or fewer samples are excluded. Each sample had n = 3 qPCR technical replicates; <sup>2</sup> Sites are sorted from lowest to highest ranking position (i.e., having the least to having the most human fecal contamination) based on the “amp1” frequency definition.

**Table S4.** Site rank contrast under wet vs. dry weather, as ranked by frequency or site average concentration. Sites are sorted from left to right by frequency of detection under dry weather conditions. Frequency of HF183 detection is defined as % samples with HF183 detection, and HF183 is said to be detected in a sample if HF183 is detected in any of the three qPCR replicates. Sites are sorted by ranking positions under dry weather.

| Site                     | Rank by frequency |     | Site                     | Rank by Site average concentration |     |
|--------------------------|-------------------|-----|--------------------------|------------------------------------|-----|
|                          | Dry               | Wet |                          | Dry                                | Wet |
| Santa Ana River          | 1.5               | 9   | Santa Ana River          | 1.5                                | 8   |
| Topanga Creek            | 1.5               | 4   | Topanga Creek            | 1.5                                | 4   |
| Malibu Creek             | 3                 | 5   | Malibu Creek             | 3                                  | 5   |
| Tecolote Creek           | 4                 | 11  | Tecolote Creek           | 4                                  | 12  |
| Solstice Creek           | 5                 | 1.5 | Solstice Creek           | 5                                  | 3   |
| Talbert Channel          | 6                 | 10  | Ramirez Creek            | 6                                  | 2   |
| Ramirez Creek            | 7                 | 3   | Aliso Creek              | 7                                  | 15  |
| Aliso Creek              | 8                 | 15  | San Diego River          | 8                                  | 7   |
| San Diego River          | 9                 | 7   | Talbert Channel          | 9                                  | 10  |
| Santa Ana Delhi Channel  | 10                | 13  | Santa Ana Delhi Channel  | 10                                 | 13  |
| Marie Canyon Storm Drain | 11                | 1.5 | Tijuana River            | 11                                 | 14  |
| Tijuana River            | 12                | 8   | Marie Canyon Storm Drain | 12                                 | 1   |
| Escondido Creek          | 13                | 6   | Ballona Creek            | 13                                 | 16  |
| Ballona Creek            | 14                | 16  | Escondido Creek          | 14                                 | 6   |
| Costa Mesa Channel       | 15                | 13  | Costa Mesa Channel       | 15                                 | 9   |
| Cottonwood Creek         | 16                | 13  | Cottonwood Creek         | 16                                 | 11  |

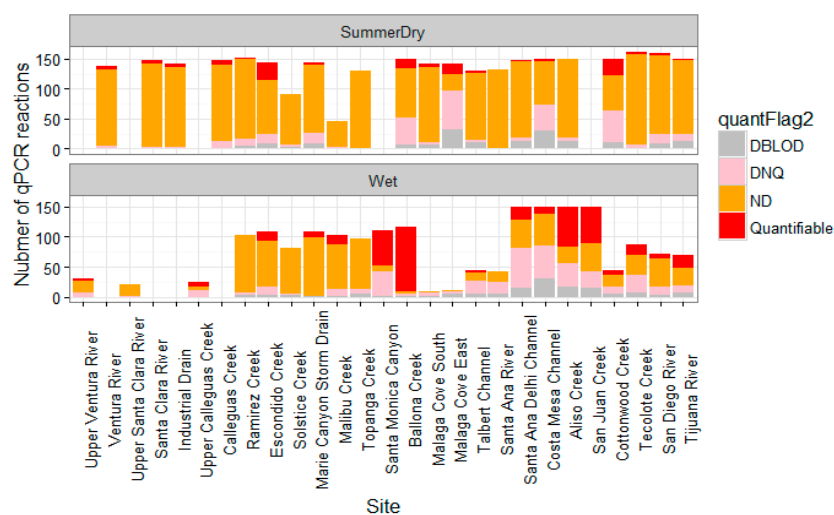

(a)

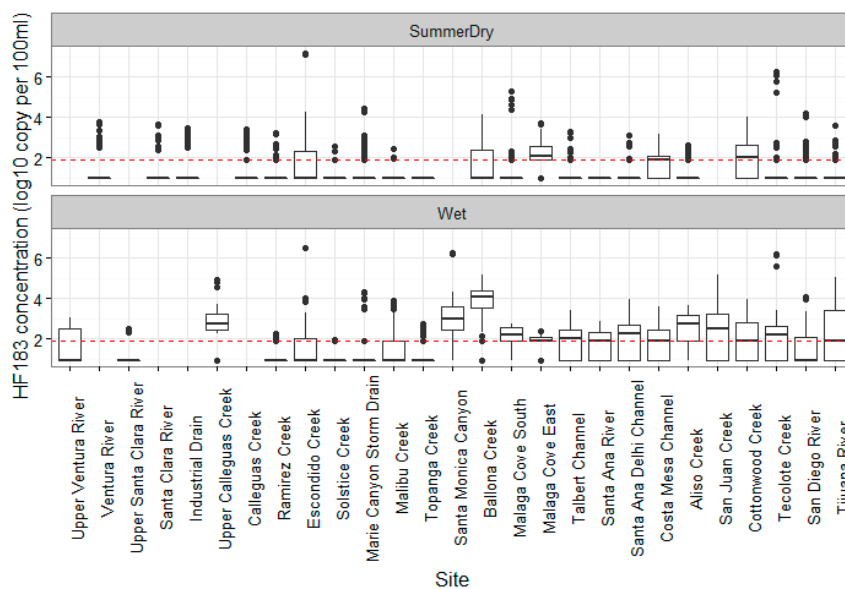

(b)

**Figure S1.** HF183 results distribution for dry and wet weather: (a) number of qPCR results in each quantification category, (b) HF183 concentrations (ND and DBLOD substituted with  $\frac{1}{2}$  and one of the limit of detection for the purpose of plotting). The dotted red line in (b) indicates the limit of detection. Note that empty spaces along the x-axis indicate that the site was not sampled during the given weather condition.

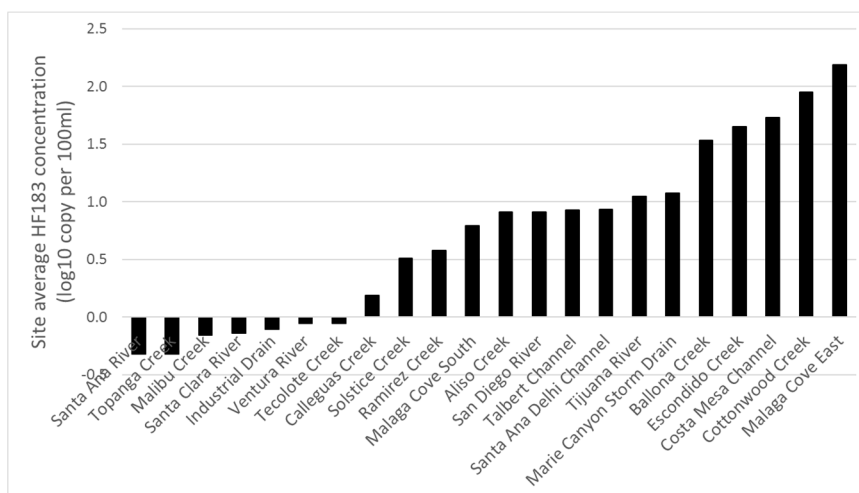

**Figure S2.** Site average HF183 concentration in log<sub>10</sub> copies per 100 mL by site for summer dry weather. The site average is calculated by the Poisson approach as described in the Appendix section.

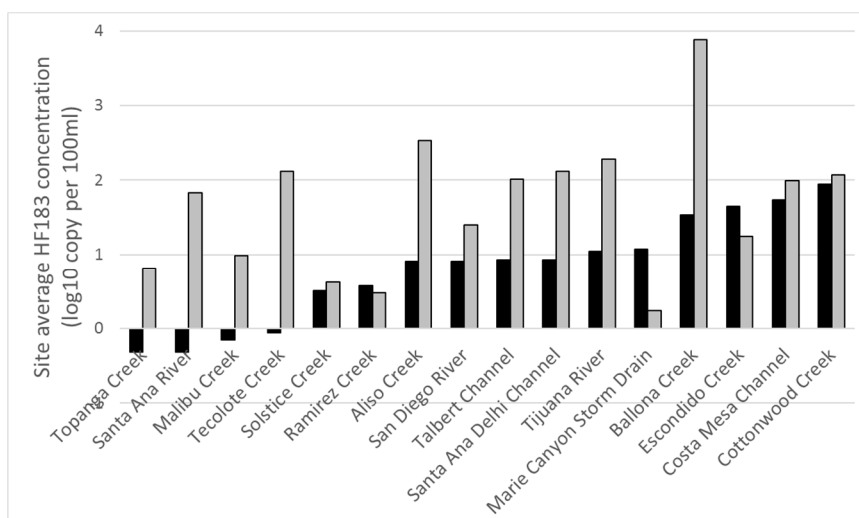

**Figure S3.** Site average HF183 concentration in log<sub>10</sub> copies per 100 mL by site in wet (grey bars) versus dry (black bars) weather conditions. The site average is calculated by the Poisson approach as described in the Appendix section. Sites are sorted from left to right by site average concentration under dry weather conditions.

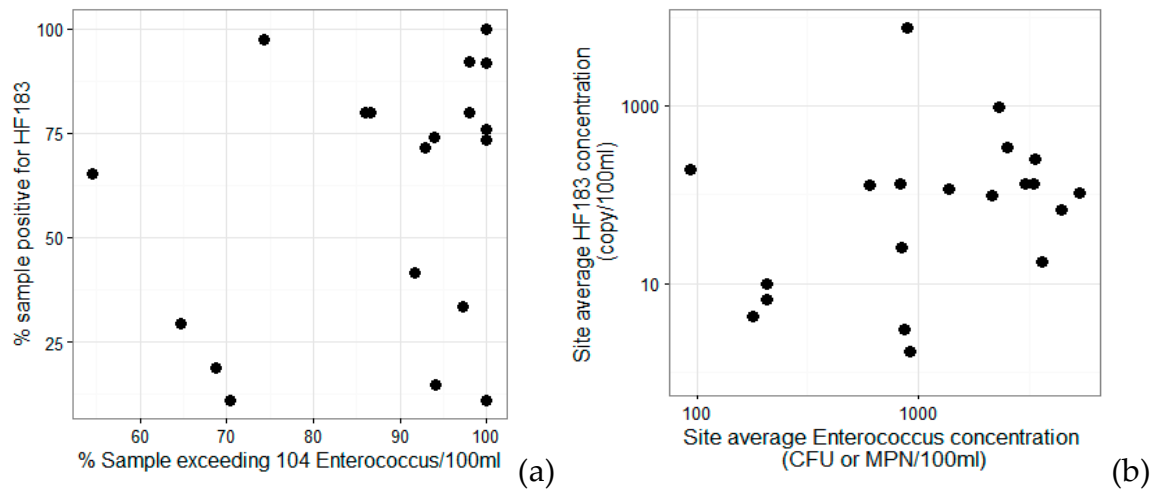

**Figure S4.** Ranking site by HF183-based metrics vs. *Enterococcus*-based metrics during wet weather: (a) Frequency of HF183 positive versus frequency of *Enterococcus* exceedance; (b) site average HF183 concentration versus site average *Enterococcus* concentration. HF183-based metrics are as defined in Figure 3. The frequency of *Enterococcus* exceedance is defined as % samples with more than 104 *Enterococcus* spp. per 100 mL. The site average concentration of *Enterococcus* spp. is defined as the geomean at the site.
